# Supplementary material for: Role of bifidobacteria in the hydrolysis of chlorogenic acid
Source: PubMed Central journal article supplement (PMC4335975; doi:10.1002/mbo3.219), 2014-12-16
Supplement: mbo30004-0041-sd1.pdf [file mbo30004-0041-sd1.pdf]

**Table S1.** tblastn analysis of ten esterases from *B. animalis* subsp. *lactis* DSM 10140 against other *Bifidobacterium* species. For each query, the top-scoring match from each species is reported.

| Query      | Species                                 | Max score | Query coverage | Max identity | Accession      |
|------------|-----------------------------------------|-----------|----------------|--------------|----------------|
| Balat_0183 | <i>B. bifidum</i>                       | 249       | 98             | 42           | WP_003819218.1 |
|            | <i>B. breve</i>                         | 238       | 94             | 43           | WP_003828717.1 |
|            | <i>B. catenulatum</i>                   | 240       | 94             | 42           | WP_003834207.1 |
|            | <i>B. longum</i> subsp. <i>infantis</i> | 241       | 94             | 44           | YP_004209323.1 |
|            | <i>B. longum</i> subsp. <i>longum</i>   | 241       | 94             | 44           | YP_005586887.1 |
|            | <i>B. pseudocatenulatum</i>             | 241       | 94             | 42           | WP_004220784.1 |
| Balat_0519 | <i>B. bifidum</i>                       | 40        | 33             | 28           | YP_003970982.1 |
|            | <i>B. breve</i>                         | 56        | 32             | 35           | YP_005583272.1 |
|            | <i>B. catenulatum</i>                   | 446       | 91             | 61           | WP_003836035.1 |
|            | <i>B. longum</i> subsp. <i>infantis</i> | 56        | 32             | 35           | YP_004209468.1 |
|            | <i>B. longum</i> subsp. <i>longum</i>   | 412       | 91             | 57           | YP_003661869.1 |
|            | <i>B. pseudocatenulatum</i>             | 445       | 91             | 61           | WP_004220040.1 |
| Balat_0593 | <i>B. bifidum</i>                       | 432       | 95             | 49           | WP_003821849.1 |
|            | <i>B. breve</i>                         | 399       | 94             | 47           | WP_016462045.1 |
|            | <i>B. catenulatum</i>                   | 338       | 99             | 39           | WP_003835320.1 |
|            | <i>B. longum</i> subsp. <i>infantis</i> | 419       | 94             | 48           | YP_004207988.1 |
|            | <i>B. longum</i> subsp. <i>longum</i>   | 424       | 95             | 48           | EIJ24166.1     |
|            | <i>B. pseudocatenulatum</i>             | 162       | 39             | 43           | WP_004221494.1 |
| Balat_0669 | <i>B. bifidum</i>                       | 31        | 23             | 34           | WP_003821651.1 |
|            | <i>B. breve</i>                         | 30        | 43             | 25           | WP_019727705.1 |
|            | <i>B. catenulatum</i>                   | 29        | 22             | 33           | WP_003836509.1 |
|            | <i>B. longum</i> subsp. <i>infantis</i> | 30        | 23             | 31           | EEQ56135.1     |
|            | <i>B. longum</i> subsp. <i>longum</i>   | 30        | 23             | 31           | YP_003999647.1 |
|            | <i>B. pseudocatenulatum</i>             | 29        | 43             | 25           | EEG70556.1     |
| Balat_0859 | <i>B. bifidum</i>                       | 164       | 96             | 48           | YP_006394573.1 |
|            | <i>B. breve</i>                         | 184       | 91             | 45           | YP_005582750.1 |
|            | <i>B. catenulatum</i>                   | 167       | 90             | 48           | WP_003834200.1 |
|            | <i>B. longum</i> subsp. <i>infantis</i> | 183       | 92             | 48           | YP_004208853.1 |
|            | <i>B. longum</i> subsp. <i>longum</i>   | 186       | 92             | 48           | EIJ22703.1     |
|            | <i>B. pseudocatenulatum</i>             | 171       | 95             | 47           | WP_004220797.1 |
| Balat_0899 | <i>B. bifidum</i>                       | 278       | 96             | 42           | WP_003812916.1 |
|            | <i>B. breve</i>                         | 32        | 67             | 26           | WP_021649292.1 |
|            | <i>B. catenulatum</i>                   | 286       | 95             | 46           | WP_003835048.1 |
|            | <i>B. longum</i> subsp. <i>infantis</i> | 281       | 89             | 47           | YP_002323033.1 |
|            | <i>B. longum</i> subsp. <i>longum</i>   | 276       | 89             | 45           | EIJ24322.1     |
|            | <i>B. pseudocatenulatum</i>             | 279       | 95             | 46           | EEG70556.1     |
| Balat_1050 | <i>B. bifidum</i>                       | 38        | 30             | 25           | YP_003970982.1 |
|            | <i>B. breve</i>                         | 180       | 90             | 34           | WP_003831575.1 |
|            | <i>B. catenulatum</i>                   | 333       | 92             | 51           | WP_003833915.1 |
|            | <i>B. longum</i> subsp. <i>infantis</i> | 139       | 86             | 31           | YP_002323832.1 |
|            | <i>B. longum</i> subsp. <i>longum</i>   | 243       | 90             | 41           | YP_005586728.1 |
|            | <i>B. pseudocatenulatum</i>             | 298       | 92             | 51           | WP_004223447.1 |

| Query      | Species                                 | Max score | Query coverage | Max identity | Accession      |
|------------|-----------------------------------------|-----------|----------------|--------------|----------------|
| Balat_1264 | <i>B. bifidum</i>                       | 419       | 97             | 70           | YP_003970608.1 |
|            | <i>B. breve</i>                         | 398       | 96             | 66           | WP_003832590.1 |
|            | <i>B. catenulatum</i>                   | 435       | 99             | 62           | WP_003834207.1 |
|            | <i>B. longum</i> subsp. <i>infantis</i> | 400       | 96             | 67           | YP_002322248.1 |
|            | <i>B. longum</i> subsp. <i>longum</i>   | 404       | 98             | 68           | YP_003661660.1 |
|            | <i>B. pseudocatenulatum</i>             | 436       | 99             | 71           | WP_004220784.1 |
| Balat_1547 | <i>B. bifidum</i>                       | 337       | 99             | 59           | WP_021647798.1 |
|            | <i>B. breve</i>                         | 45        | 67             | 26           | WP_016463038.1 |
|            | <i>B. catenulatum</i>                   | 30        | 37             | 27           | WP_003833915.1 |
|            | <i>B. longum</i> subsp. <i>infantis</i> | 374       | 99             | 66           | YP_002321557.1 |
|            | <i>B. longum</i> subsp. <i>longum</i>   | 339       | 99             | 61           | EIJ23907.1     |
|            | <i>B. pseudocatenulatum</i>             | 383       | 100            | 68           | WP_004223450.1 |
| Balat_1604 | <i>B. bifidum</i>                       | 315       | 77             | 63           | YP_003939530.1 |
|            | <i>B. breve</i>                         | 310       | 81             | 61           | YP_005583710.1 |
|            | <i>B. catenulatum</i>                   | 340       | 77             | 67           | WP_003835361.1 |
|            | <i>B. longum</i> subsp. <i>infantis</i> | 299       | 80             | 60           | YP_004209856.1 |
|            | <i>B. longum</i> subsp. <i>longum</i>   | 299       | 80             | 60           | EEI80347.1     |
|            | <i>B. pseudocatenulatum</i>             | 340       | 77             | 68           | WP_004223872.1 |
